# Supplementary material for: Diabetic ketoacidosis induced by nivolumab in invasive mucinous adenocarcinoma of the lung: a case report and review of the literature
Source: PubMed Central journal article supplement — Ann Transl Med. 2022 Nov;10(22):1256. doi: 10.21037/atm-22-5211 (PMC9761142; doi:10.21037/atm-22-5211), 2022-11
Supplement: atm-10-22-1256-rc.pdf [file atm-10-22-1256-rc.pdf]

## CARE Checklist of information to include when writing a case report

| Topic                            | Item No | Checklist item description                                                                                                                                                     | Reported on Page Number/Line Number         | Reported on Section/Paragraph |
|----------------------------------|---------|--------------------------------------------------------------------------------------------------------------------------------------------------------------------------------|---------------------------------------------|-------------------------------|
| Title                            | 1       | The diagnosis or intervention of primary focus followed by the words "case report"                                                                                             | Page1/line1-2                               | Title/para1                   |
| Key Words                        | 2       | 2 to 5 key words that identify diagnoses or interventions in this case report, including "case report"                                                                         | Page1/line38-39                             | Key word/para1                |
| Abstract<br>(Structured summary) | 3a      | Background: state what is known and unknown; why the case report is unique and what it adds to existing literature.                                                            | Page1/line16-21                             | abstract/para1                |
|                                  | 3b      | Case Description: describe the patient's demographic details, main symptoms, history, important clinical findings, the main diagnosis, interventions, outcomes and follow-ups. | Page1-2/line22-34                           | abstract/para2                |
|                                  | 3c      | Conclusions: summarize the main take-away lesson, clinical impact and potential implications.                                                                                  | Page2/line35-37                             | abstract/para3                |
| Introduction                     | 4       | One or two paragraphs summarizing why this case is unique ( <b>may include references</b> )                                                                                    | Page2-3/line41-58                           | introduction/para1-2          |
| Patient Information              | 5a      | De-identified patient specific information                                                                                                                                     | Page3/line60                                | Case presentation/para1       |
|                                  | 5b      | Primary concerns and symptoms of the patient                                                                                                                                   | Page3/line61-63                             | Case presentation/para1       |
|                                  | 5c      | Medical, family, and psycho-social history including relevant genetic information                                                                                              | Page3/line63-68                             | Case presentation/para1       |
|                                  | 5d      | Relevant past interventions with outcomes                                                                                                                                      | Page4-5/line69-105                          | Case presentation/para2       |
| Clinical Findings                | 6       | Describe significant physical examination (PE) and important clinical findings                                                                                                 | Page5/line106-110                           | Case presentation/para3       |
| Timeline                         | 7       | Historical and current information from this episode of care organized as a timeline                                                                                           | Page16/line329                              | figure/para1                  |
| Diagnostic Assessment            | 8a      | Diagnostic testing (such as PE, laboratory testing, imaging, surveys).                                                                                                         | Page5-7/line109-110,116-120,124-127,132-133 | Case presentation/para3-6     |
|                                  | 8b      | Diagnostic challenges (such as access to testing, financial, or cultural)                                                                                                      | NA                                          | NA                            |
|                                  | 8c      | Diagnosis (including other diagnoses considered)                                                                                                                               | Page6/line117                               | Case presentation/para4       |
|                                  | 8d      | Prognosis (such as staging in oncology) where applicable                                                                                                                       | Page6/line128-129                           | Case presentation/para4       |
| Therapeutic Intervention         | 9a      | Types of therapeutic intervention (such as pharmacologic, surgical, preventive, self-care)                                                                                     | Page6/line111-115,120-122,125-130           | Case presentation/para3-6     |
|                                  | 9b      | Administration of therapeutic intervention (such as dosage, strength, duration)                                                                                                | Page6-7/line128-130,136-137                 | Case presentation/para5-6     |
|                                  | 9c      | Changes in therapeutic intervention (with rationale)                                                                                                                           | Page6/line112-113                           | Case presentation/para6       |

|                        |     |                                                                                                        |                                     |                         |
|------------------------|-----|--------------------------------------------------------------------------------------------------------|-------------------------------------|-------------------------|
| Follow-up and Outcomes | 10a | Clinician and patient-assessed outcomes (if available)                                                 | Page6-7/line131-133                 | Case presentation/para6 |
|                        | 10b | Important follow-up diagnostic and other test results                                                  | Page7/line137-138                   | Case presentation/para6 |
|                        | 10c | Intervention adherence and tolerability (How was this assessed?)                                       | Page7/line139-142                   | Case presentation/para6 |
|                        | 10d | Adverse and unanticipated events                                                                       | Page7/line138                       | Case presentation/para6 |
| Discussion             | 11a | A scientific discussion of the strengths AND limitations associated with this case report              | Page7-9/line144-157,167-168,178-179 | discussion/para1-3      |
|                        | 11b | Discussion of the relevant medical literature <b>with references</b>                                   | Page9/line180-190                   | discussion/para4        |
|                        | 11c | The scientific rationale for any conclusions (including assessment of possible causes)                 | Page9-10/line191-202                | discussion/para5        |
|                        | 11d | The primary “take-away” lessons of this case report (without references) in a one paragraph conclusion | Page10/line203-213                  | discussion/para6        |
| Patient Perspective    | 12  | The patient should share their perspective in one to two paragraphs on the treatment(s) they received  | NA                                  | NA                      |
| Informed Consent       | 13  | Did the patient give informed consent? Please provide if requested                                     | <b>Yes</b>                          |                         |

Article information: <https://dx.doi.org/10.21037/atm-22-5211>

\*As the checklist was provided upon initial submission, the page number/line number reported may be changed due to copyediting and may not be referable in the published version. In this case, the section/paragraph may be used as an alternative reference.
